# Supplementary material for: De novo identification of LTR retrotransposons in eukaryotic genomes
Source: Springer Nature journal article supplement (doi:10.1186/1471-2164-8-90), 2007-04-03
Supplement: Additional file 3 [file 1471-2164-8-90-s3.doc]

**
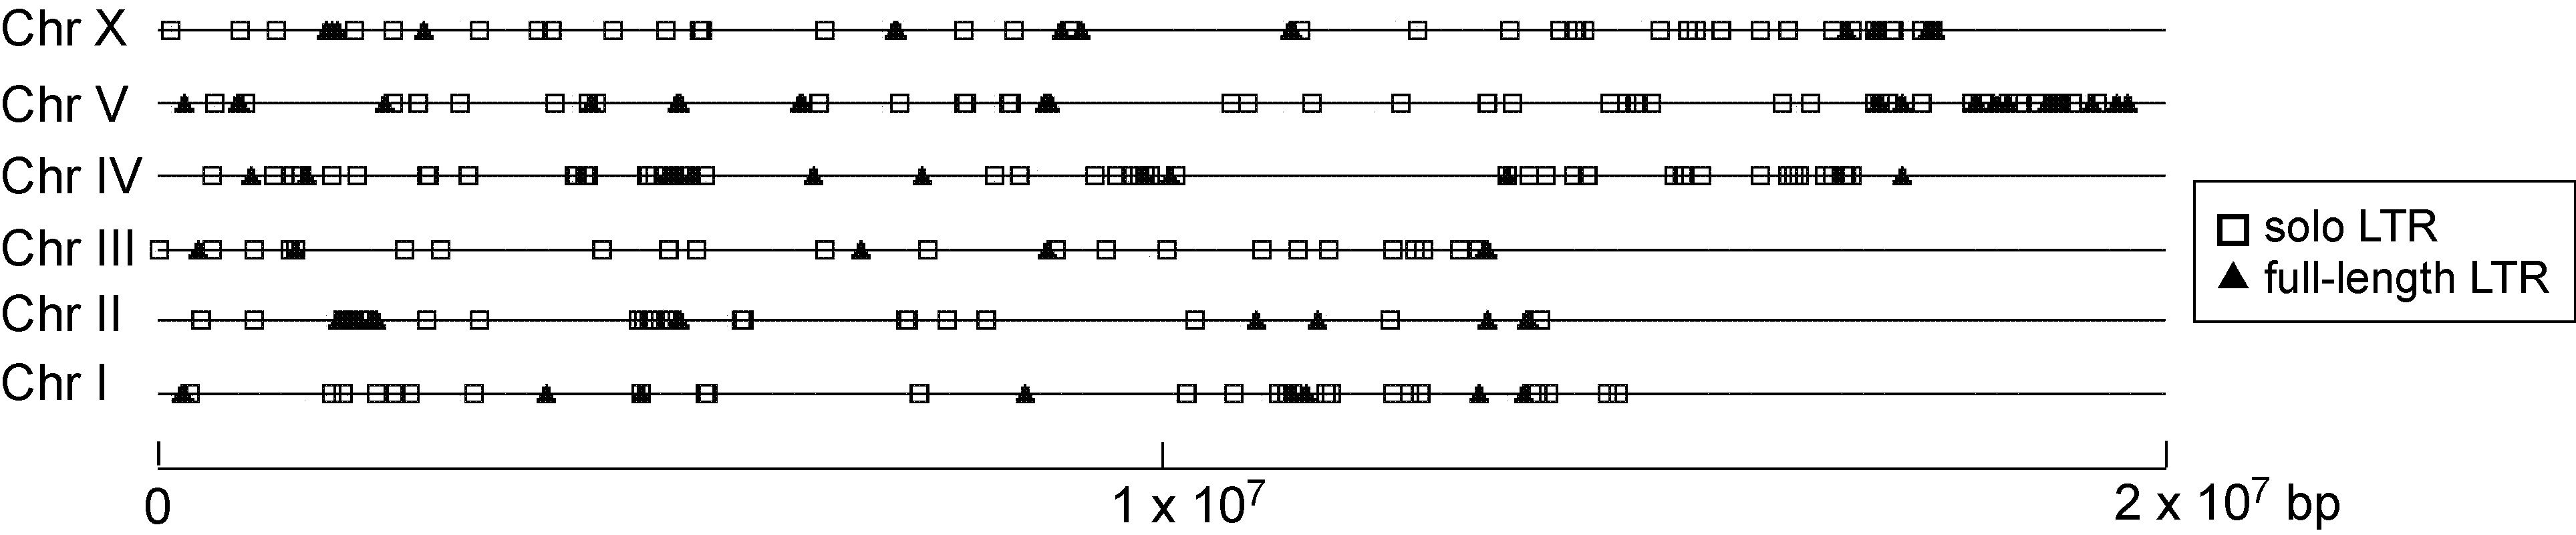
**

**Supplementary Figure 3:** Distribution of LTR retroelements in the *C. elegans* genome. The coordinates of elements are plotted with respect to their chromosomal locations.
